# Supplementary material for: Discovery of Sulforaphane as an Inducer of Ferroptosis in U-937 Leukemia Cells: Expanding Its Anticancer Potential
Source: Cancers (Basel). 2021 Dec 24;14(1):76. doi: 10.3390/cancers14010076 (PMC8750507; doi:10.3390/cancers14010076)
Supplement: Supplementary file 1 [file cancers-14-00076-s001.zip › cancers-1480790-supplementary.pdf]

## Supplementary Materials

# Discovery of sulforaphane as an inducer of ferroptosis in U-937 leukemia cells: expanding its anticancer potential

Giulia Greco<sup>1</sup>, Michael Schnekenburger<sup>2</sup>, Elena Catanzaro<sup>1</sup>, Eleonora Turrini<sup>1</sup>, Fabio Ferrini<sup>3</sup>, Piero Sestili<sup>3</sup>, Marc Diederich<sup>4</sup>, Carmela Fimognari<sup>1\*</sup>

<sup>1</sup>Dipartimento di Scienze per la Qualità della Vita, Alma Mater Studiorum-Università di Bologna, Corso d'Augusto 237, 47921 Rimini, Italy

<sup>2</sup>Laboratoire de Biologie Moléculaire et Cellulaire du Cancer, Hôpital Kirchberg, 9 rue Edward Steichen, L-2540 Luxembourg, Luxembourg

<sup>3</sup>Dipartimento di Scienze Biomolecolari, Università degli Studi di Urbino Carlo Bo, 61029 Urbino, Italy

<sup>4</sup>Department of Pharmacy, College of Pharmacy, Seoul National University, 1 Gwanak-ro, Gwanak-gu, Seoul 08826, Korea

\* Correspondence: [carmela.fimognari@unibo.it](mailto:carmela.fimognari@unibo.it)

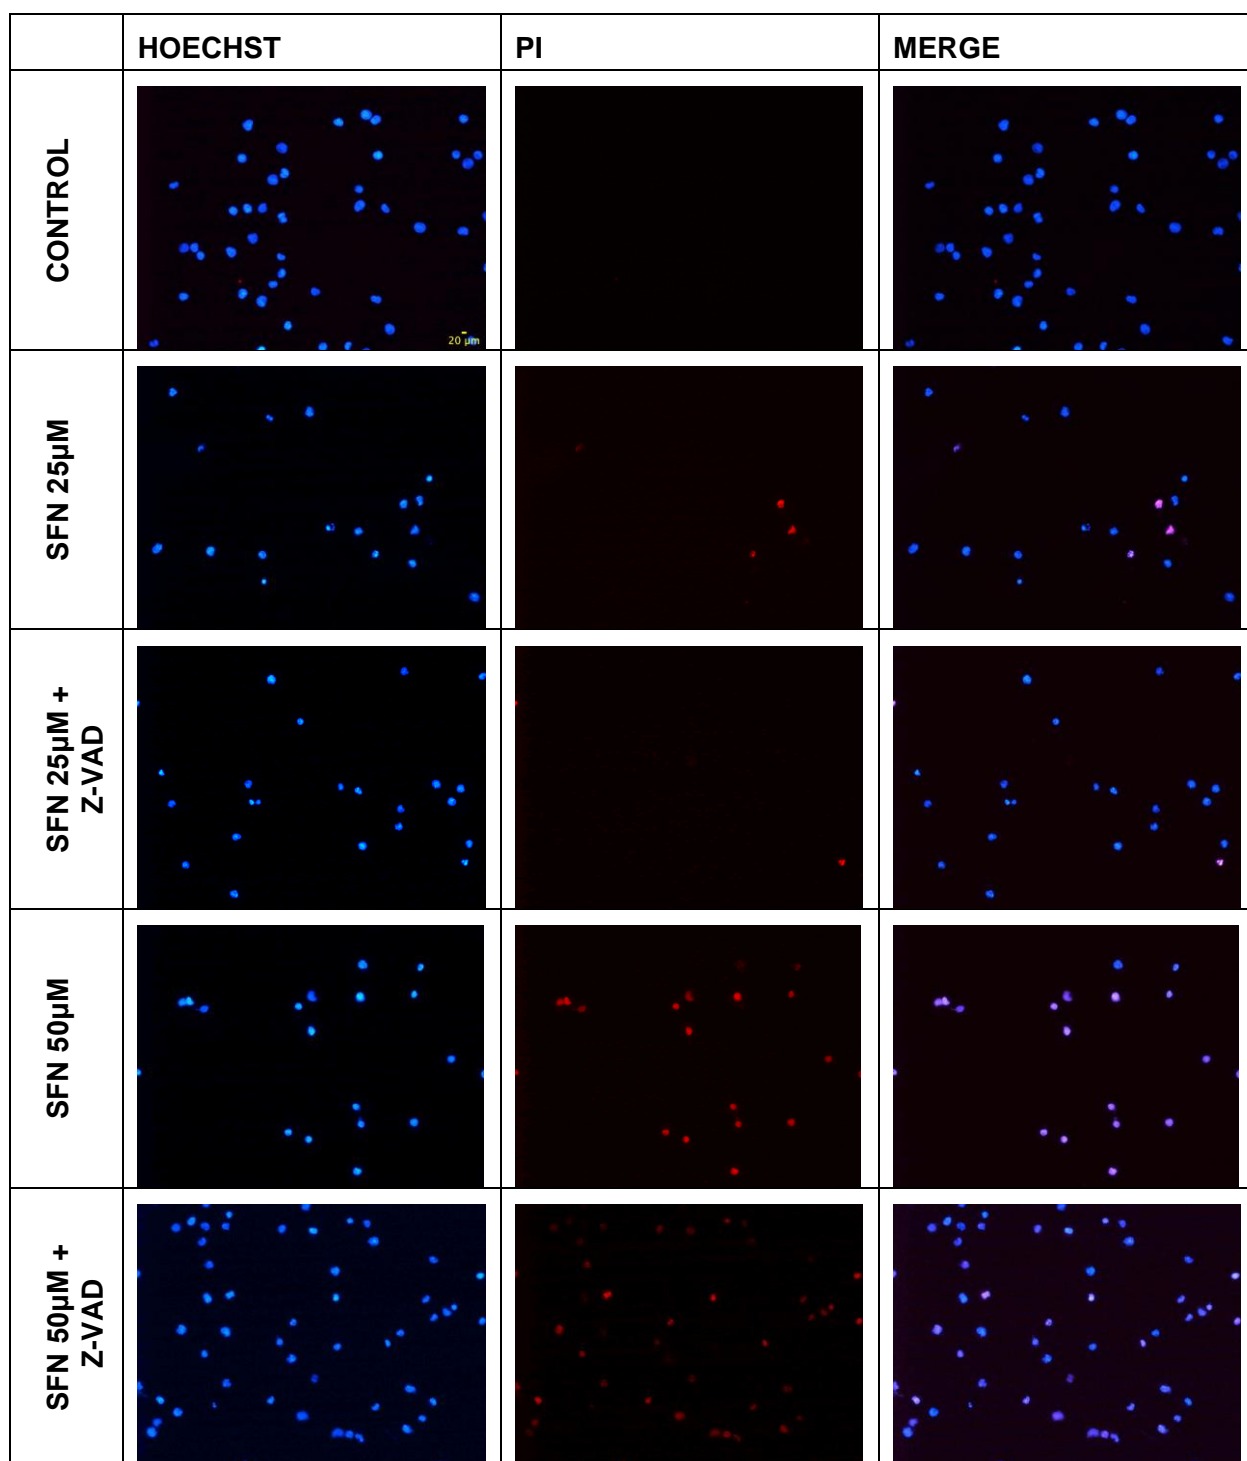

**Figure S1.** Representative images of the analysis of nuclear morphology by fluorescent microscopy of U-937 cells pre-treated or not with Z-VAD-FMK (Z-VAD) and then treated with SFN 25 or 50  $\mu$ M for 24h.

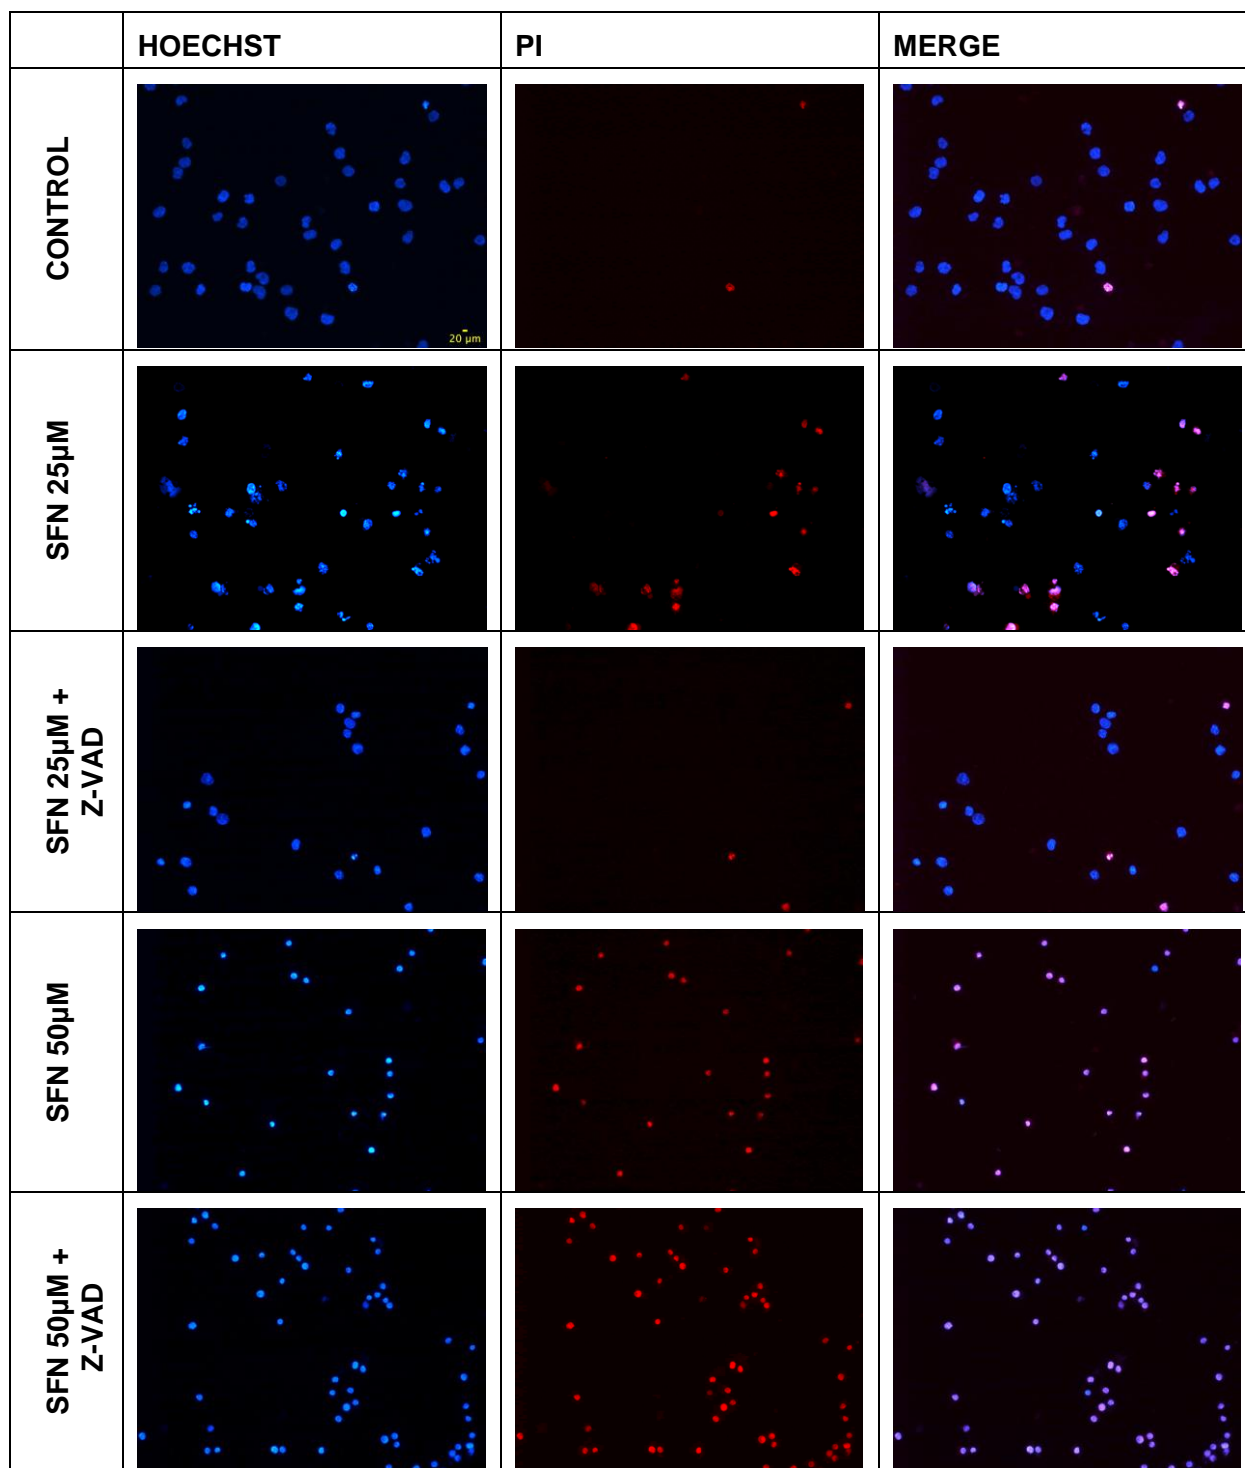

**Figure S2.** Representative images of the analysis of nuclear morphology by fluorescent microscopy of MV4-11 cells pre-treated or not with Z-VAD-FMK (Z-VAD) and then treated with SFN 25 or 50  $\mu$ M for 24h.

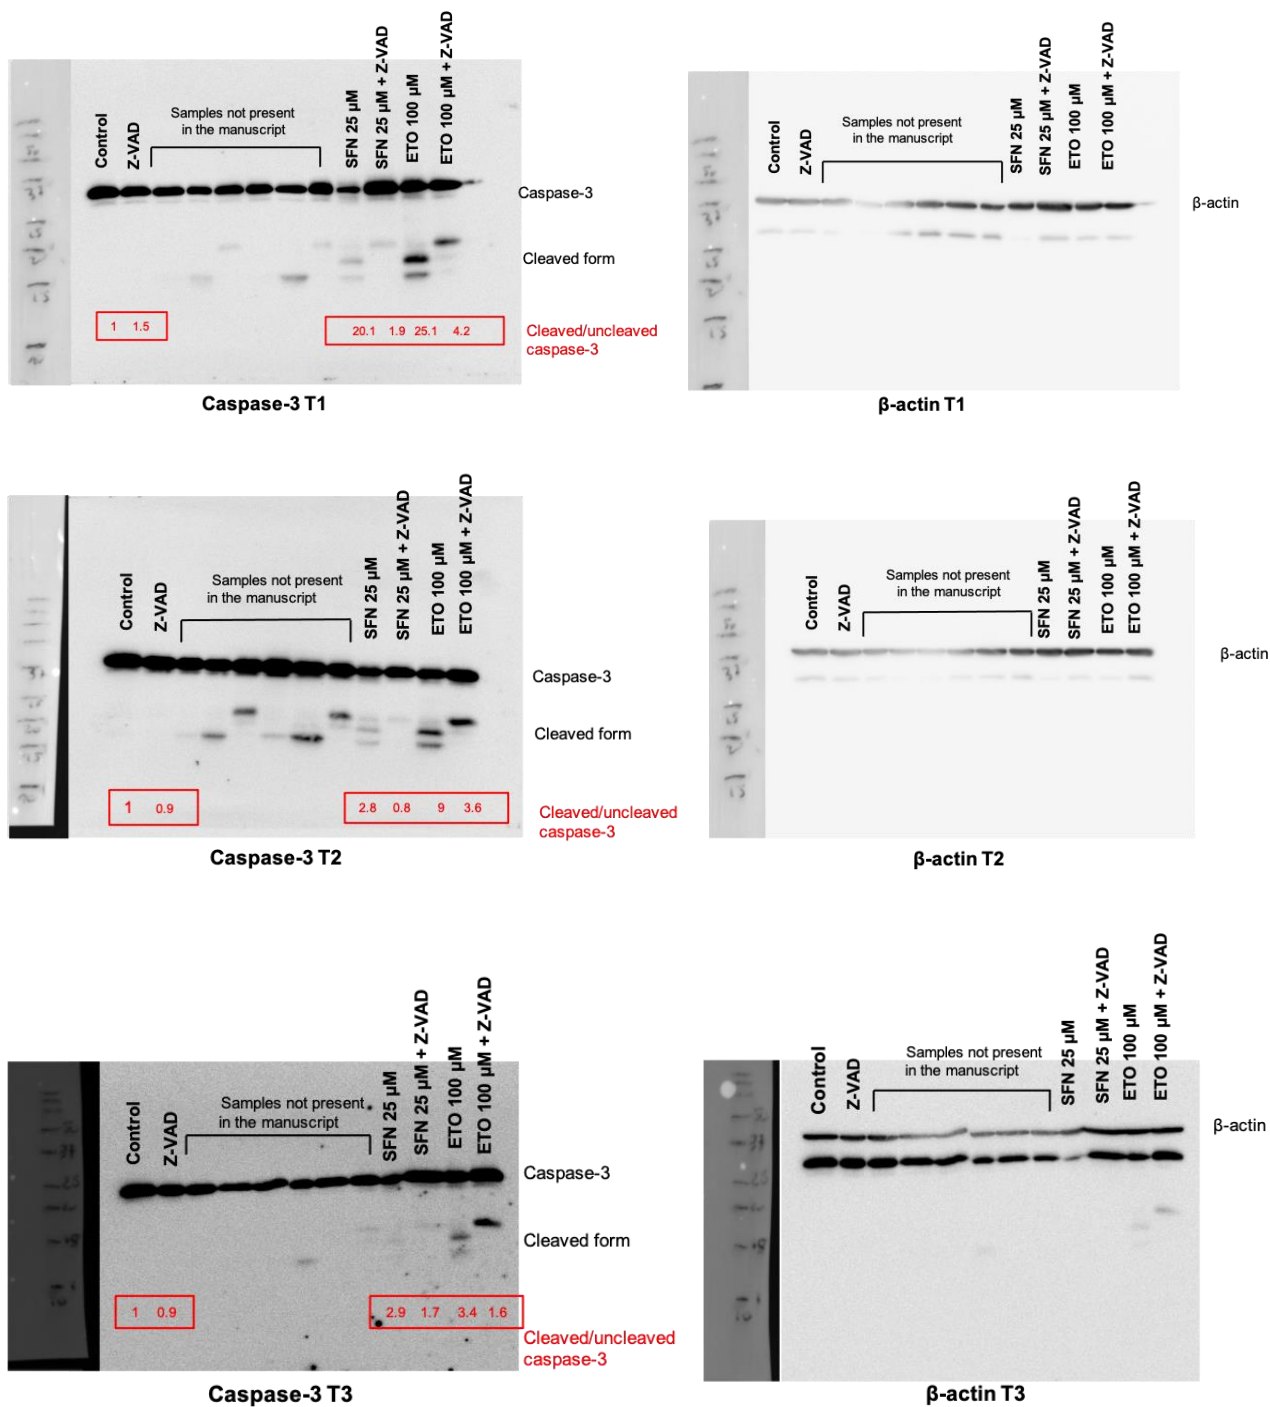

**Figure S3.** Uncropped images (whole Western Blot images) showing bands overlaid with the molecular weight marker of the three replicates related to the protein expression of full and cleaved caspase-3, and respective protein expression of  $\beta$ -actin on U-937 cells. The ratio of cleaved/uncleaved caspase-3 is showed for the three replicates.

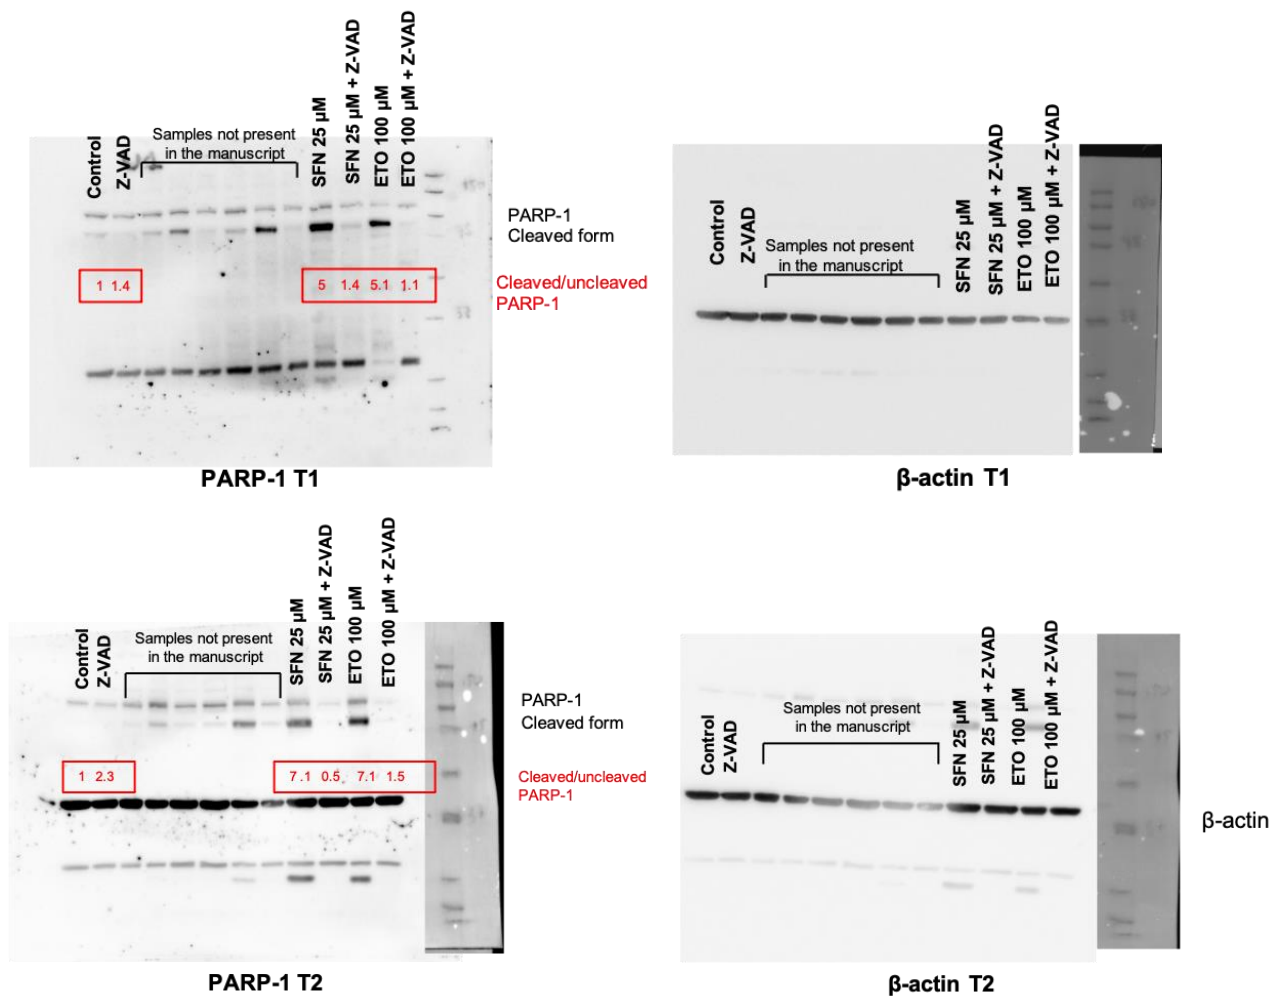

**Figure S4.** Uncropped images (whole Western Blot images) showing bands overlaid with the molecular weight marker of the two replicates related to the protein expression of full and cleaved PARP-1, and respective protein expression of  $\beta$ -actin of U-937 cells. The ratio of cleaved/uncleaved PARP-1 is showed for the two replicates.

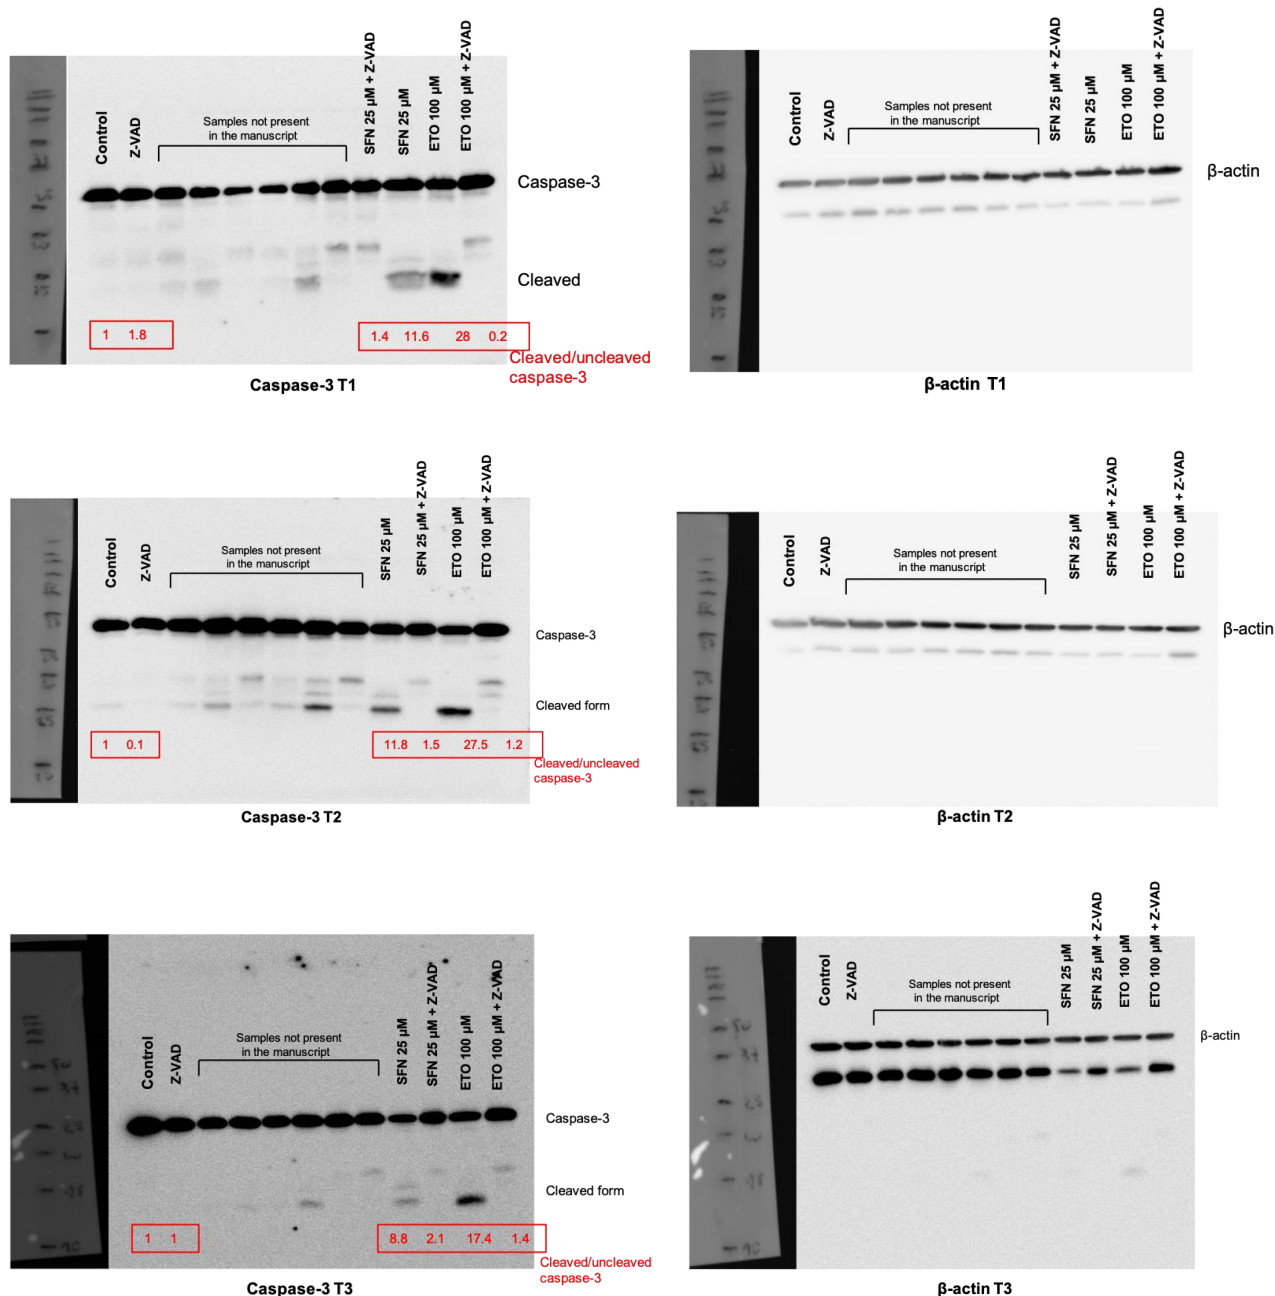

**Figure S5.** Uncropped images (whole Western Blot images) showing bands overlaid with the molecular weight marker of the three replicates related to the protein expression of full and cleaved caspase-3, and respective protein expression of  $\beta$ -actin on MV4-11 cells. The ratio of cleaved/uncleaved caspase-3 is showed for three replicates.

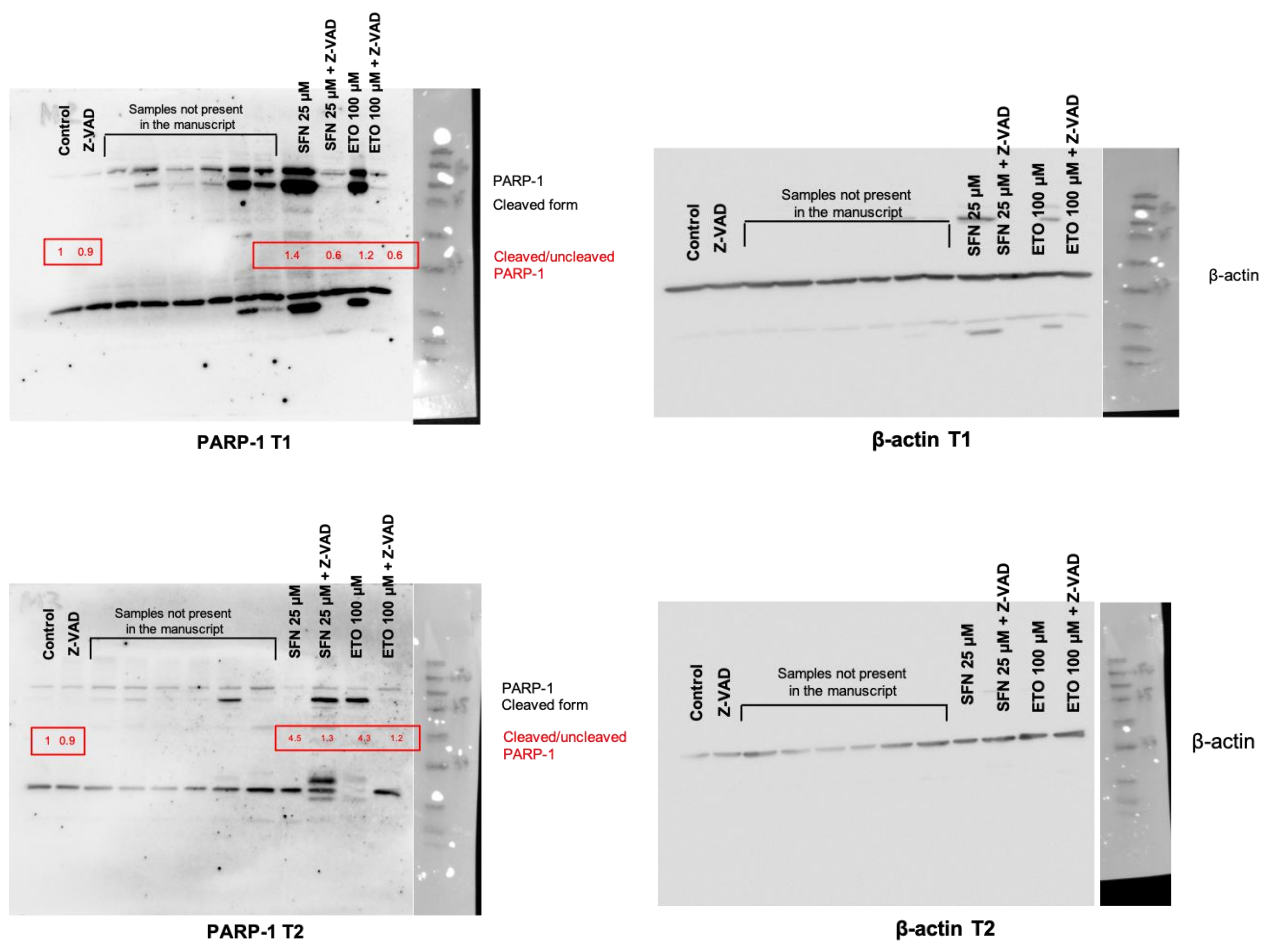

**Figure S6.** Uncropped images (whole Western Blot images) showing bands overlaid with the molecular weight marker of the two replicates related to the protein expression of full and cleaved PARP-1, and respective protein expression of  $\beta$ -actin on MV4-11 cells. The ratio of cleaved/uncleaved PARP-1 is showed for the two replicates.

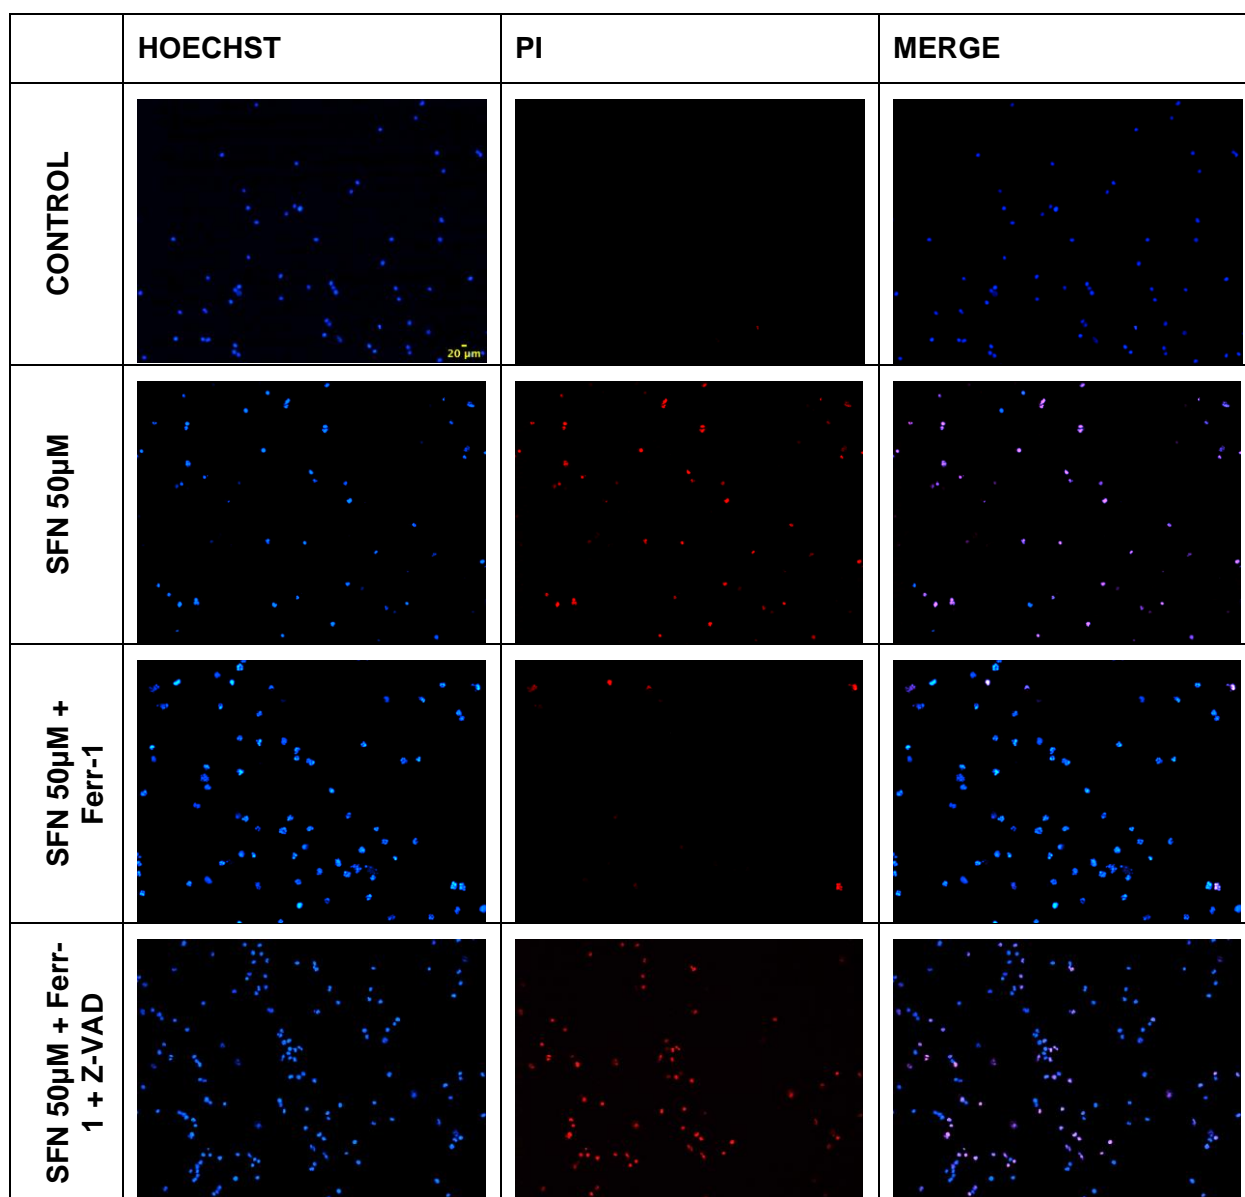

**Figure S7.** Representative images of the analysis of nuclear morphology by fluorescent microscopy of U-937 cells pre-treated with ferrostatin (Ferr-1) with or without Z-VAD-FMK (Z-VAD) and then treated with SFN 50 μM for 24h.

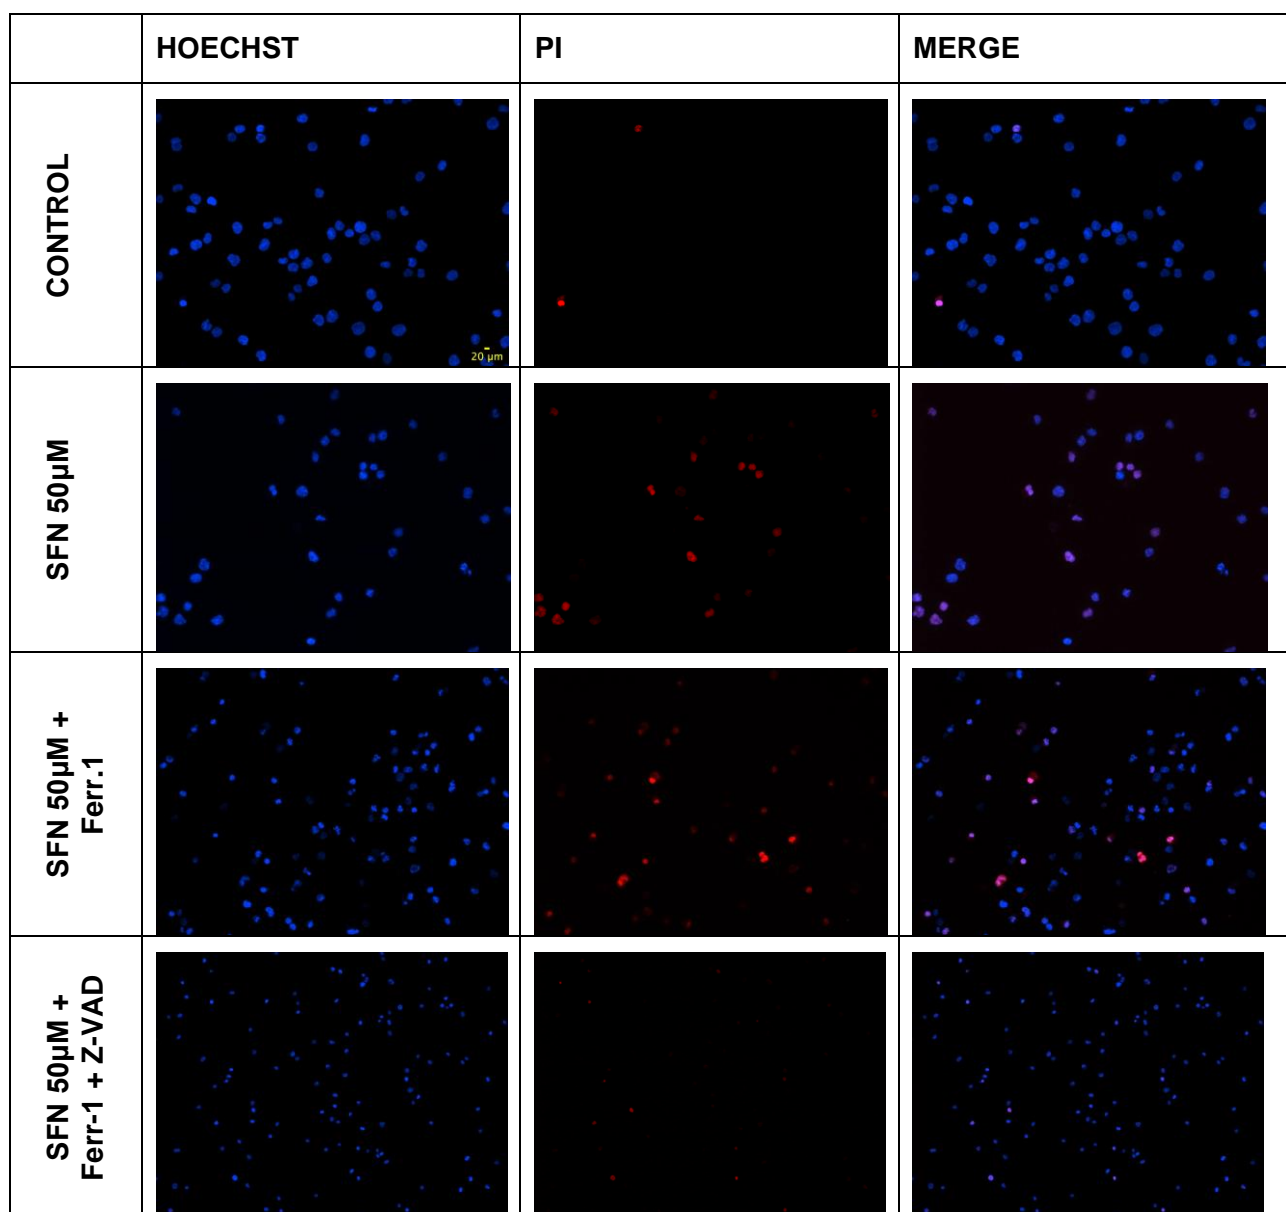

**Figure S8.** Representative images of the analysis of nuclear morphology by fluorescent microscopy of MV4-11 cells pre-treated with ferrostatin-1 (Ferr-1) with or without Z-VAD-FMK (Z-VAD) and then treated with SFN 50 μM for 24h.

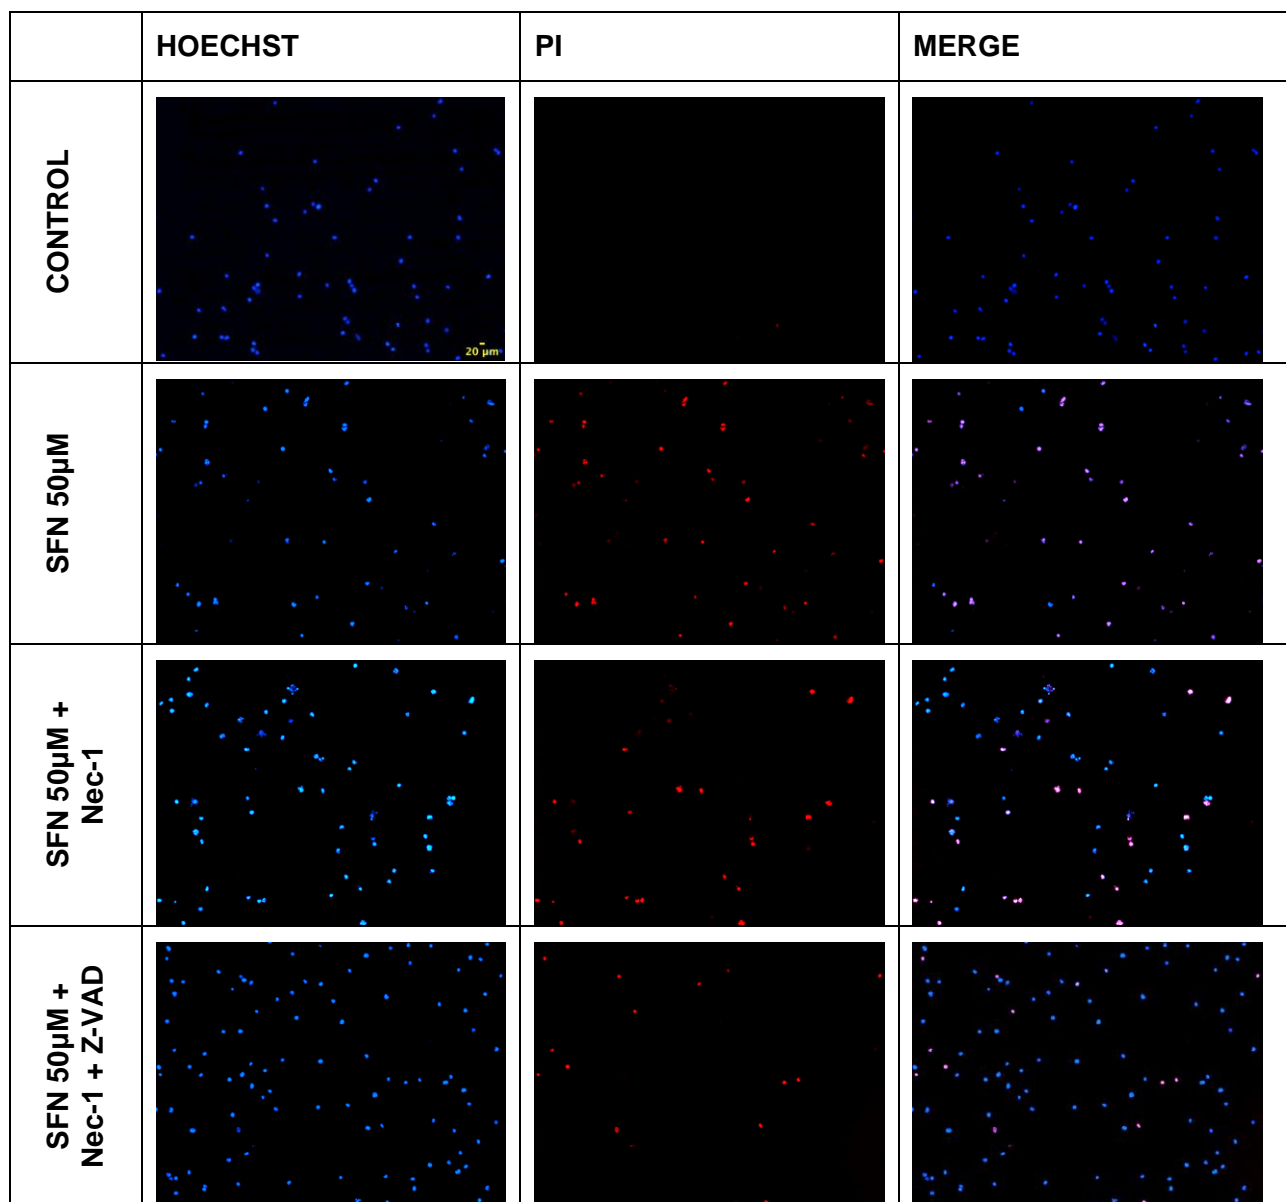

**Figure S9.** Representative images of the analysis of nuclear morphology by fluorescent microscopy of U-937 cells pre-treated with necrostatin-1 (Nec-1) with or without Z-VAD-FMK (Z-VAD) and then treated with SFN 50  $\mu$ M for 24h.

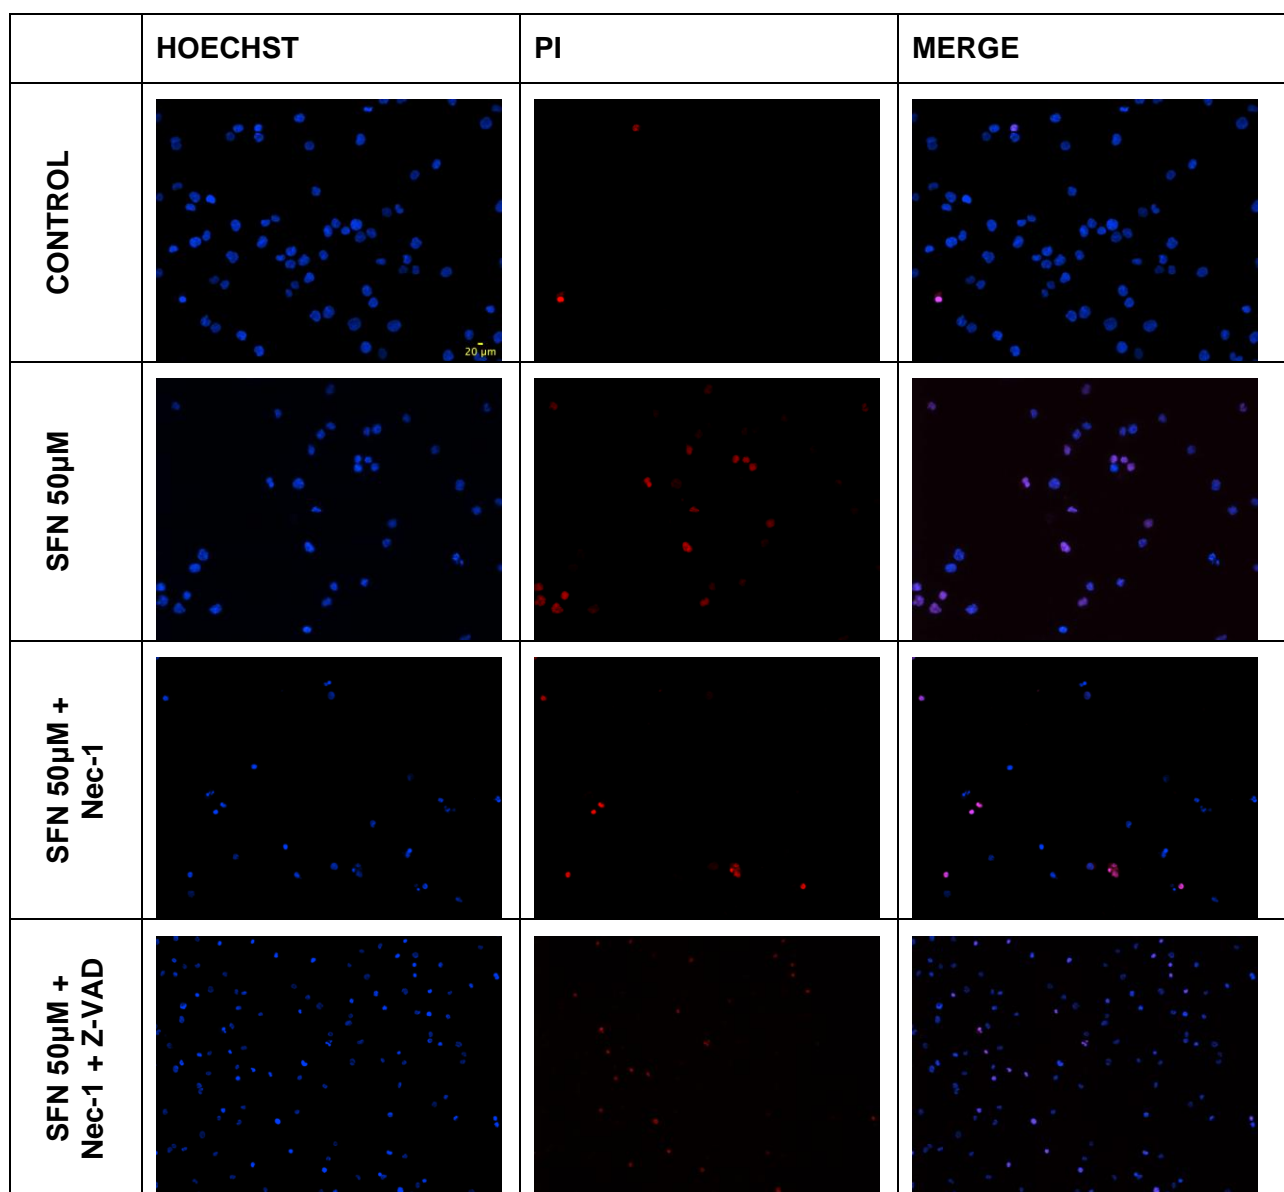

**Figure S10.** Representative images of the analysis of nuclear morphology by fluorescent microscopy of MV4-11 cells pre-treated with necrostatin-1 (Nec-1) with or without Z-VAD-FMK (Z-VAD) and then treated with SFN 50  $\mu$ M for 24h.

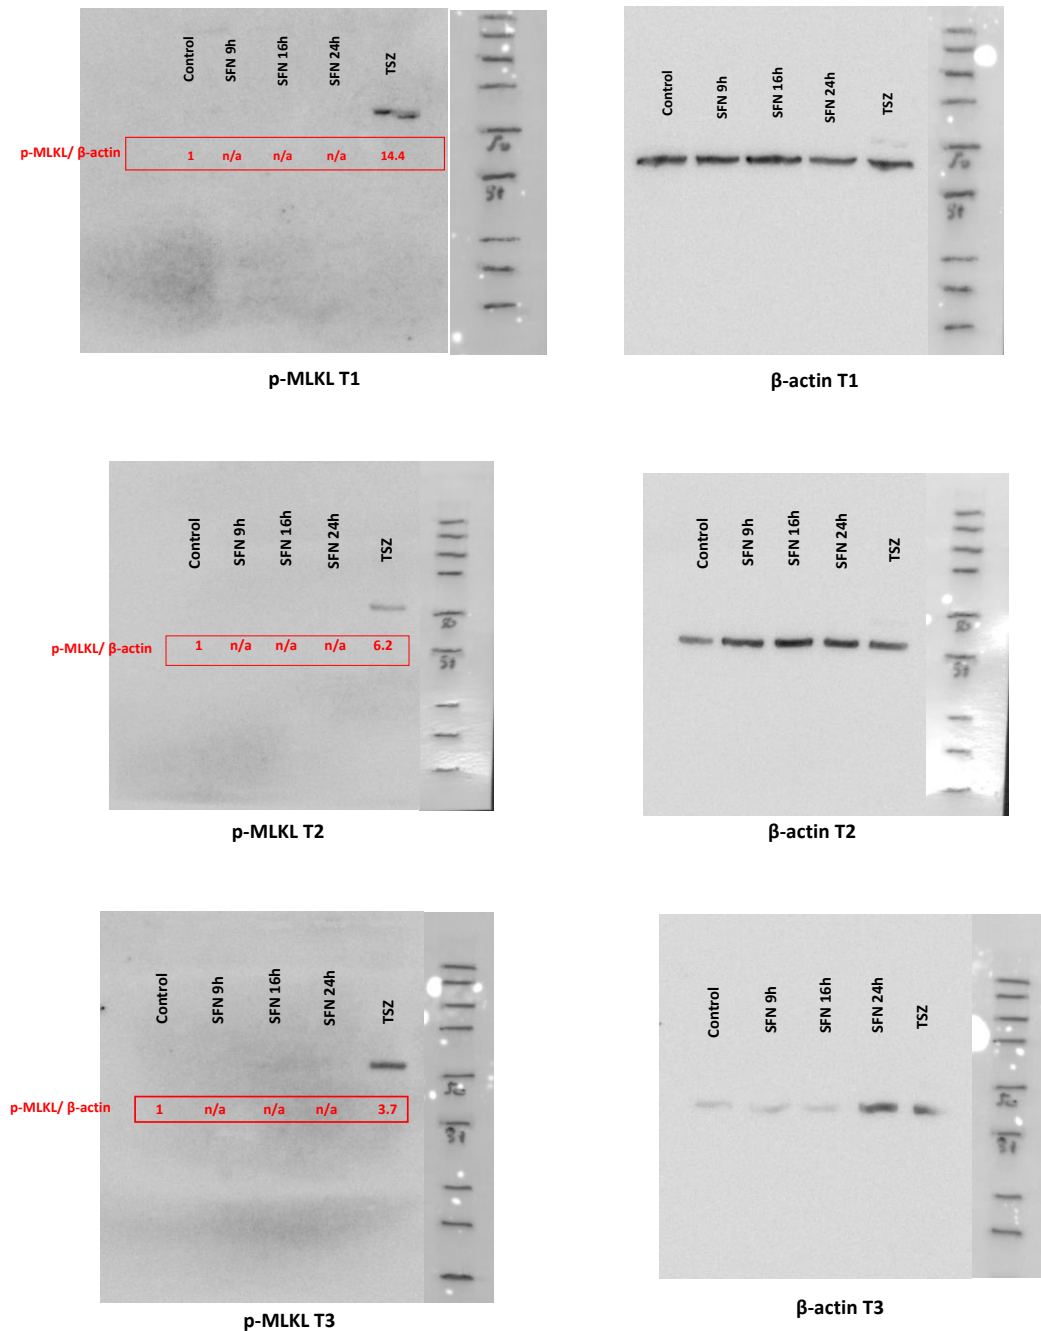

**Figure S11.** Uncropped images (whole Western Blot images) showing bands overlaid with the molecular weight marker of the three replicates related to the protein expression of phosphorylated MLKL (p-MLKL) and the respective protein expression of β-actin. Quantification is expressed as fold change *versus* untreated cells (normalized to β-actin).

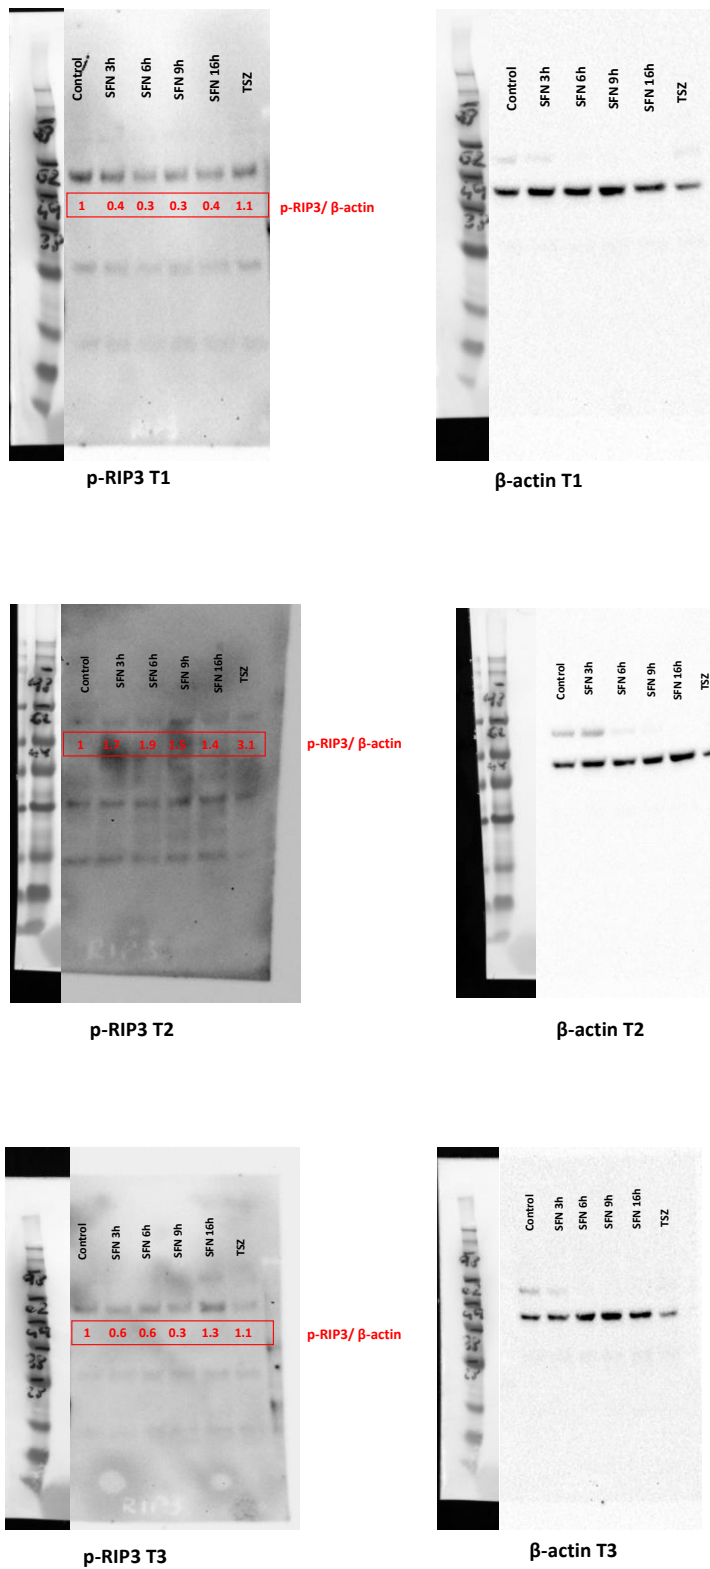

**Figure S12.** Uncropped images (whole Western Blot images) showing bands overlaid with the molecular weight marker of the three replicates related to the protein expression of phosphorylated RIP3 (p-RIP3) and respective protein expression of  $\beta$ -actin. Quantification is expressed as fold change *versus* untreated cells (normalized to  $\beta$ -actin).
